# Supplementary material for: A sign-inverted receptive field of inhibitory interneurons provides a pathway for ON-OFF interactions in the retina
Source: PubMed Central journal article supplement (PMC10517963; doi:10.1038/s41467-023-41638-3), 2023-09-23
Supplement: 41467_2023_41638_MOESM1_ESM.pdf [file 41467_2023_41638_MOESM1_ESM.pdf]

## Supplementary information

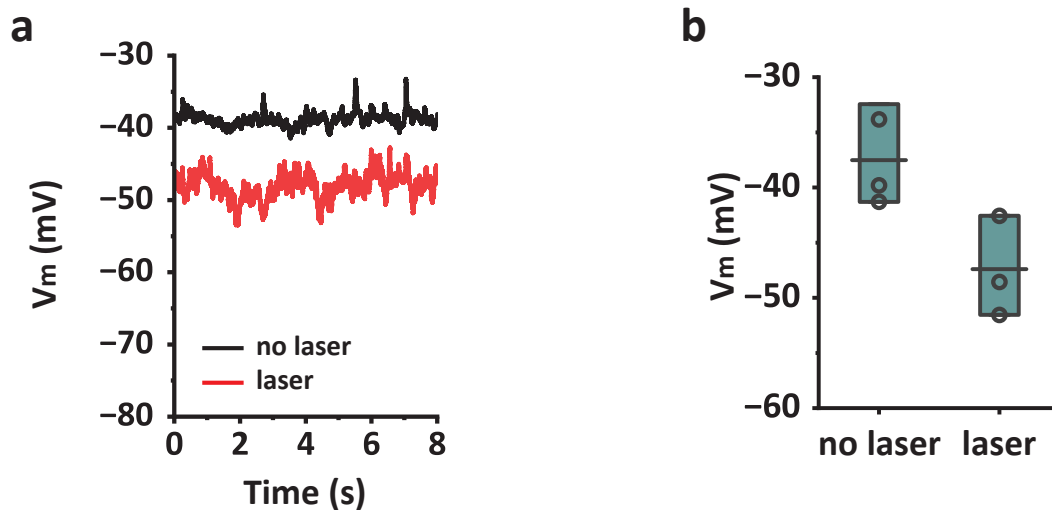

**Supplementary Figure 1. Estimation of direct two-photon laser excitation of the photoreceptors.** **a.** Whole-cell recording of membrane potential of a SI-AC with or without two-photon laser excitation. It is important to consider the photoactivating effect of unfocused infrared laser light on photoreceptor outer segments when comparing the results from GCaMP6 imaging and whole-cell recording. To measure this photoactivation, we recorded the  $V_m$  of SI-AC before and during laser scanning and observed a sustained hyperpolarization. By comparing the hyperpolarizing effect of two-photon laser illumination during current clamp recording ( $\sim 9.8$  mV) with the effect of applying a background light in the absence of scanning (Figure 2j, orange curve), we conclude that the two-photon laser produces a hyperpolarizing response equivalent to  $\sim 1000$   $R^*/rod/s$ . As a result, the total light exposure was  $2500$   $R^*/rod/s$ , while the dark condition maintained an intensity of  $1000$   $R^*/rod/s$ . **b.** Summary of membrane potential with or without two-photon laser excitation.  $N=3$  cells for both. The box plot displays the mean, 25th, and 75th percentiles, while the whiskers indicate the 1.5 interquartile range. Source data are provided as a Source Data file. Experiments were performed on VGAT-iCreER;Scg2-tTA;Ai93 mice.

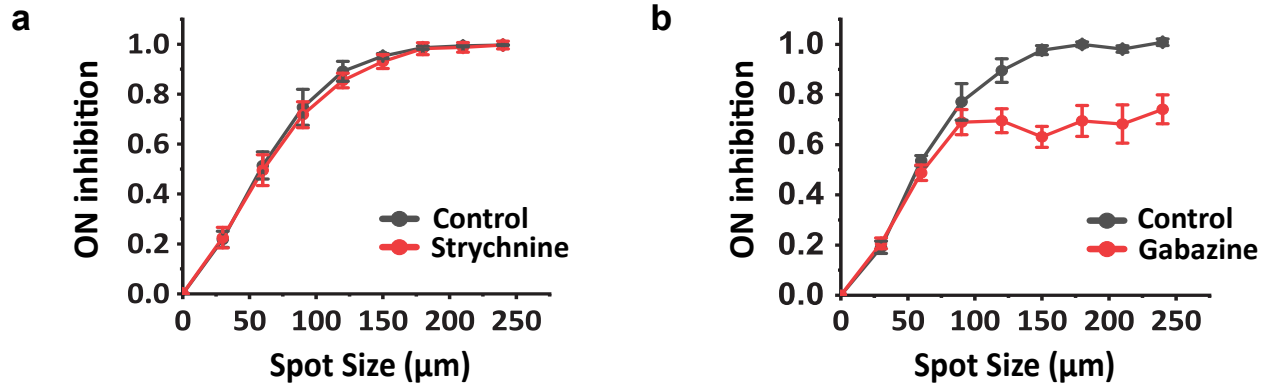

**Supplementary Figure 2. Contributions of GABAergic and glycinergic inhibition to ON inhibition/hyperpolarization of SI-AC.** **a.** 10μM Strychnine (glycine receptor antagonist) had no effect on the ON inhibition, n=9 cells. Error Bars: SEM. ns:  $p = 0.055$ , Wilcoxon Signed Rank test, two tailed. **b.** 50μM Gabazine (GABA<sub>A</sub> antagonist) decreased the ON inhibition at spots larger than 100μm, n=5 cells. Error Bars: SEM. \* $p = 0.016$ , Wilcoxon Signed Rank test, two tailed. Experiments were performed on VGAT-iCreER;Scg2-tTA;Ai93 mice.

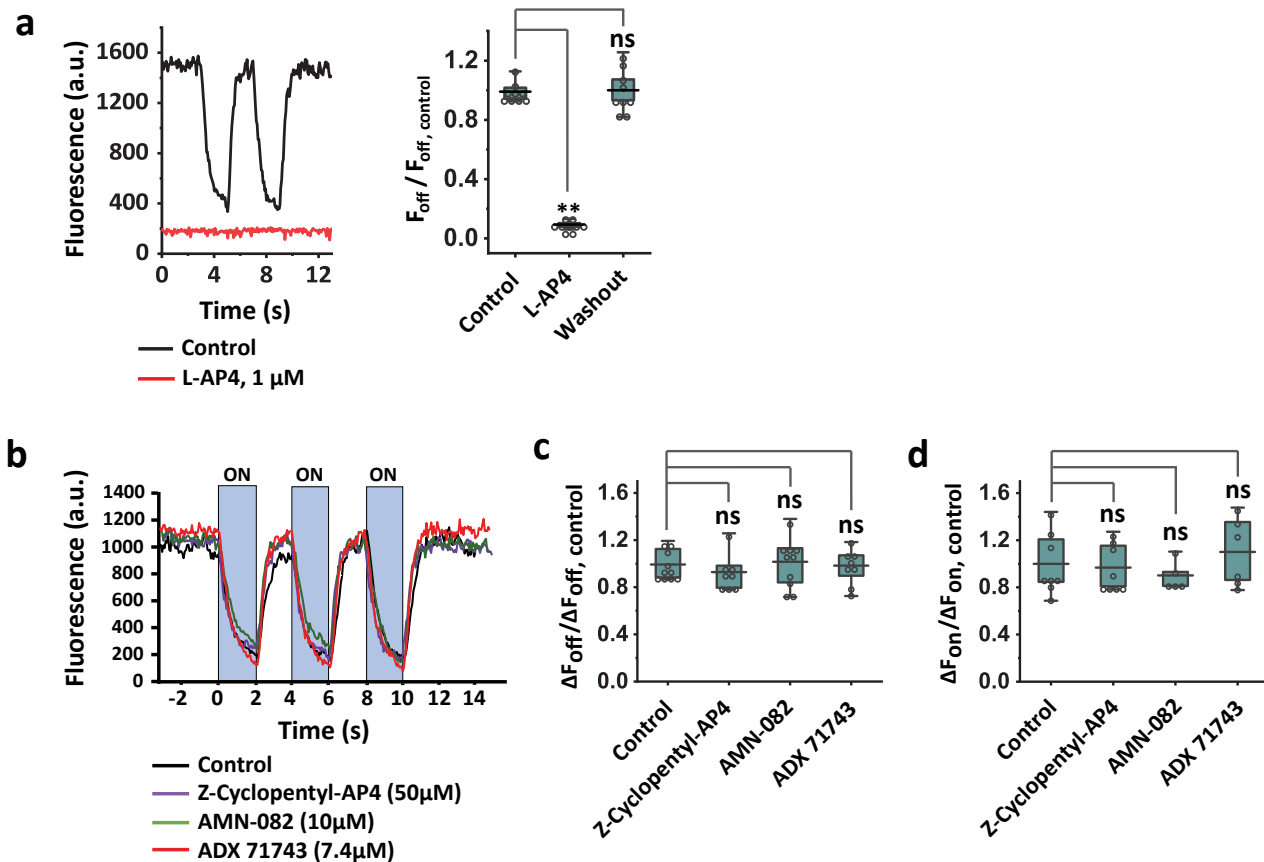

**Supplementary Figure 3. mGluR4 and mGluR7 didn't mediate ON inhibition.** **a** L-AP4 (1  $\mu$ M), the group III mGluRs agonist, abolished GCaMP responses in the dark and light,  $n=9$  cells.  $**p = 0.002$ , Wilcoxon Signed Rank test, one tailed. ns:  $p = 0.91$ , Wilcoxon Signed Rank test, two tailed. **b-d** Z-Cyclopentyl-AP4 (group III mGluR agonist more potent on mGluR4 than mGluR8), AMN-082 (selective agonist for mGluR7) and ADX 71743 (a negative allosteric modulator for mGluR7) had no effect on the responses (**d**) or resting signal (**c**) in SI-AC. **c**  $n=10$  cells for control,  $n= 8$  cells for Z-Cyclopentyl-AP4 (ns:  $p = 0.38$ ),  $n=10$  cells for AMN-082 (ns:  $p = 1.0$ ),  $n= 8$  cells for ADX 71743 (ns:  $p = 0.94$ ), Wilcoxon Signed Rank test, two tailed. **d**  $n=8$  cells for control,  $n=8$  cells for Z-Cyclopentyl-AP4 (ns:  $p = 0.84$ ),  $n=5$  cells for AMN-082 (ns:  $p = 0.13$ ),  $n= 6$  cells for ADX 71743 (ns:  $p = 0.84$ ), Wilcoxon Signed Rank test, two tailed. The box plots display the mean, 25th, and 75th percentiles, while the whiskers indicate the 1.5 interquartile range. Source data are provided as a Source Data file. Experiments were performed on VGAT-iCreER;Scg2-tTA;Ai93 mice.

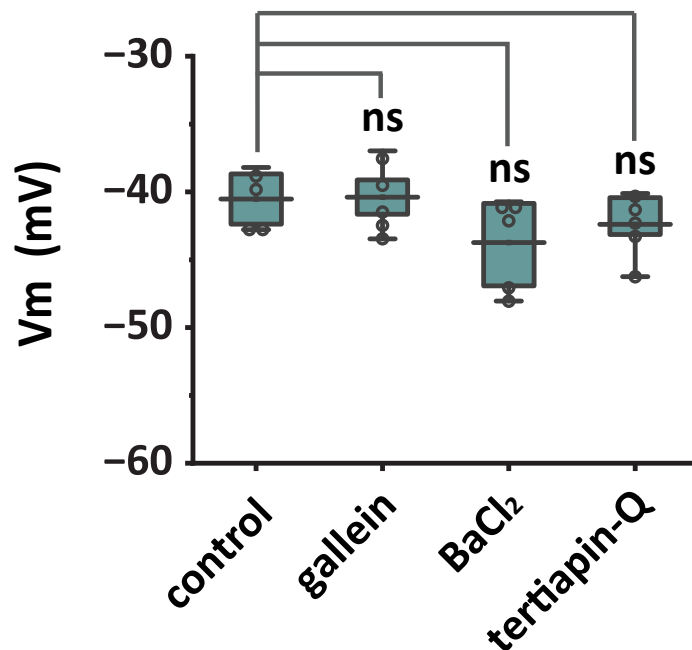

**Supplementary Figure 4. Gallein, BaCl<sub>2</sub>, and tertiapin-Q had no effect on membrane potential in the dark.** N=5 cells for all. ns:  $p = 0.67$  (gallein),  $p = 0.40$  (BaCl<sub>2</sub>),  $p = 0.27$  (tertiapin-Q), Mann-Whitney Test, two tailed. The box plot displays the mean, 25th, and 75th percentiles, while the whiskers indicate the 1.5 interquartile range. Source data are provided as a Source Data file. Experiments were performed in VGAT-iCreER;Scg2-tTA;Ai93 mice.

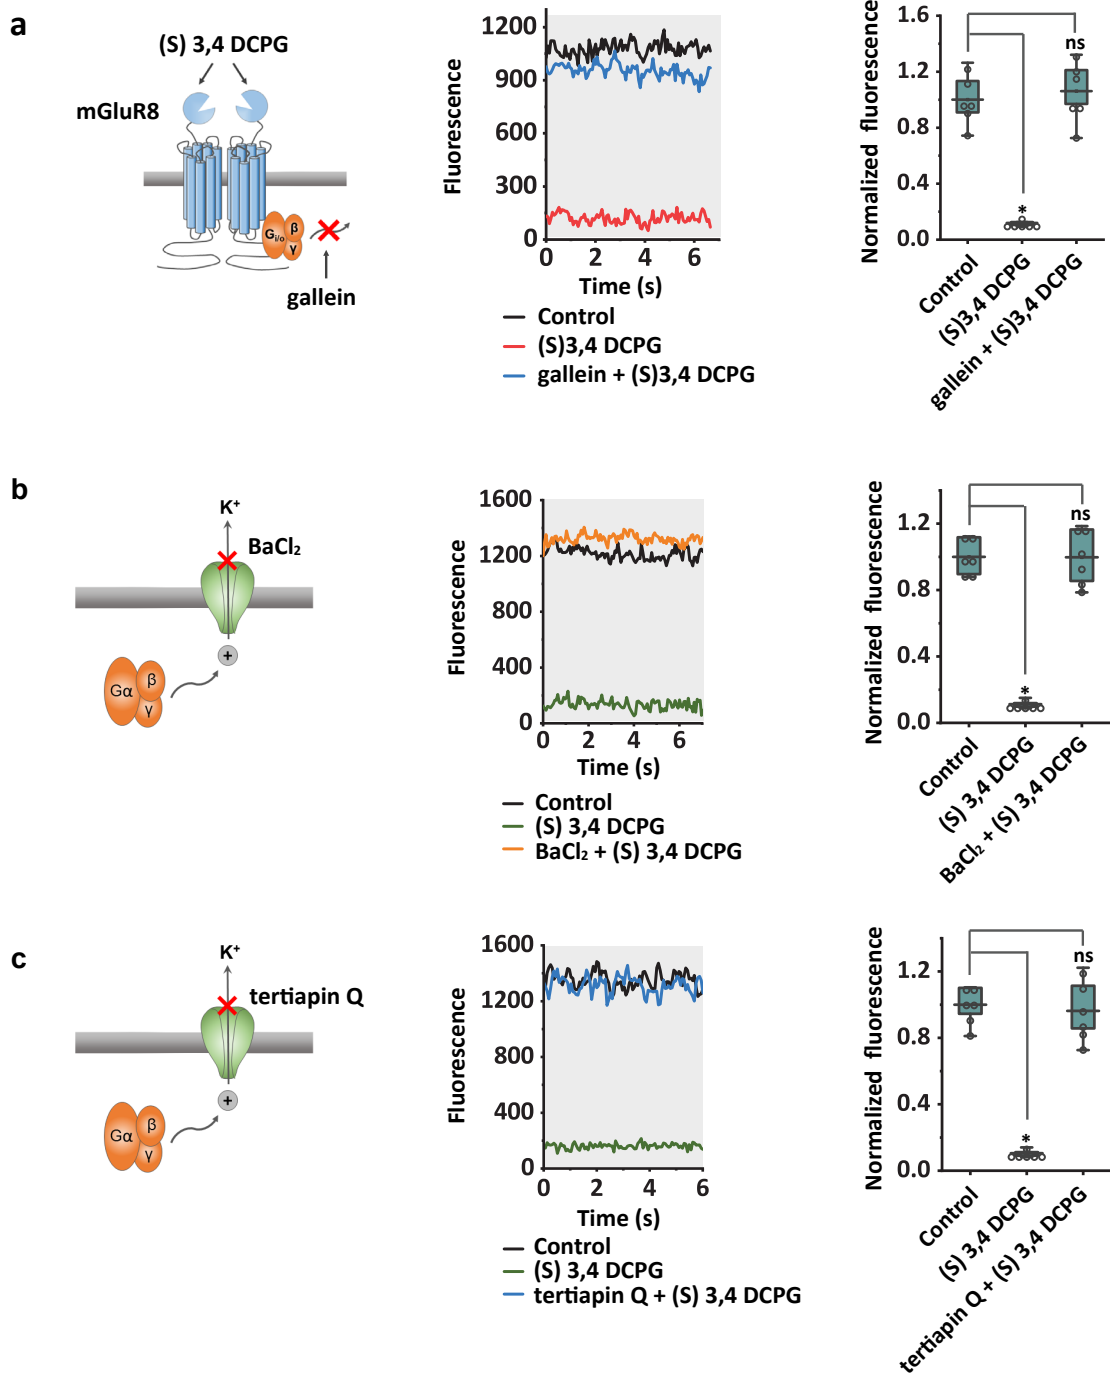

**Supplementary Figure 5. Decrease in the intracellular Ca<sup>2+</sup> concentration in ON inhibition is exclusively mediated by G-protein  $\beta\gamma$  subunits and GIRK channels.** In this scenario, the mGluR8 agonist (S) 3,4 DCPG (0.5 $\mu$ M) acts directly on SI-AC to and reduces the intracellular Ca<sup>2+</sup> concentration. Gallein (100  $\mu$ M) (a), BaCl<sub>2</sub> (100  $\mu$ M) (b), and tertiapin-Q (500 nM) (c) in the bath completely reverse the effect of (S) 3,4 DCPG (0.5 $\mu$ M) on the GCaMP6 signal (n=6 cells for all), suggesting the decrease in the intracellular Ca<sup>2+</sup> concentration in ON inhibition was exclusively mediated by G-protein  $\beta\gamma$  subunits and GIRK channels. **a** \* $p$  = 0.031, ns:  $p$  = 1.00. **b** \* $p$  = 0.031, ns:  $p$  = 0.68. **c** \* $p$  = 0.031, ns:  $p$  = 0.69. Wilcoxon Signed Rank test, two tailed. The box plots display the mean, 25th, and 75th percentiles, while the whiskers indicate the 1.5 interquartile range. Source data are provided as a Source Data file. Experiments were performed in VGAT-iCreER;Scg2-tTA;Ai93 mice.

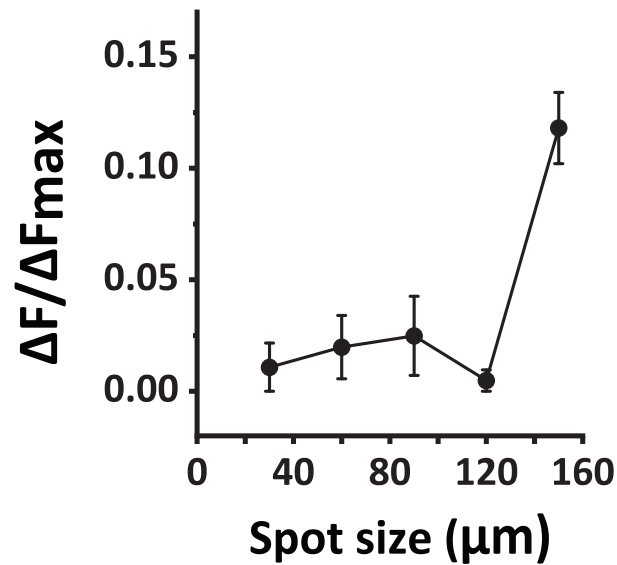

**Supplementary Figure 6. Spatial profile of OFF responses to small dark spots.** The OFF responses were measured with a dark spot (0% contrast) with enlarging diameter presented on a gray background (50% contrast).  $\Delta F/\Delta F_{\max} = (F - F_{0\mu\text{m}})/(F_{900\mu\text{m}} - F_{0\mu\text{m}})$ , as in Figure 7c. N=5 cells. Error bars: SEM. Experiments were performed in VGAT-iCreER;Scg2-tTA;Ai93 mice.

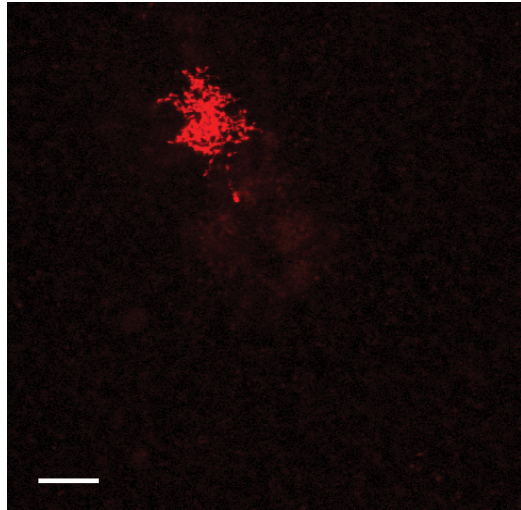

**Supplementary Figure 7. MFA in the bath abolished labeling of the wide-field AC.** Scale bar: 25 $\mu$ m. Experiments were replicated independently in at least 8 cells with similar results.

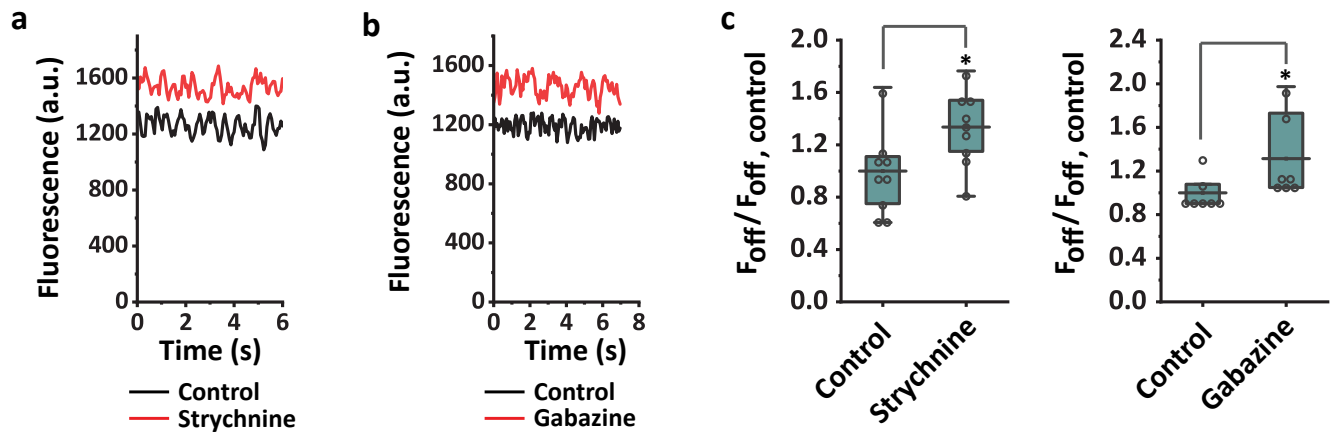

**Supplementary Figure 8. SI-AC received a small, tonic level of GABAergic and Glycinergic inhibition from other ACs in the dark. a-b** Strychnine (a) and Gabazine (b) slightly enhanced GCaMP6 signals in the dark. **c** Summary of the effects of Strychnine and Gabazine on GCaMP6 OFF response,  $n=9$  cells for Strychnine ( $*p = 0.039$ ),  $n=7$  cells for Gabazine ( $*p = 0.031$ ). Wilcoxon Signed Rank test, two tailed. The box plots display the mean, 25th, and 75th percentiles, while the whiskers indicate the 1.5 interquartile range. Source data are provided as a Source Data file. Experiments were performed in VGAT-iCreER;Scg2-tTA;Ai93 mice.
